# Supplementary material for: Facile synthesis of mesoporous titanium dioxide doped by Ag-coated graphene with enhanced visible-light photocatalytic performance for methylene blue degradation
Source: Royal Society of Chemistry journal article supplement (doi:10.1039/c7ra02198d), 2017-01-01
Supplement: c7ra02198d1.pdf [file c7ra02198d1.pdf]

Fig.S1

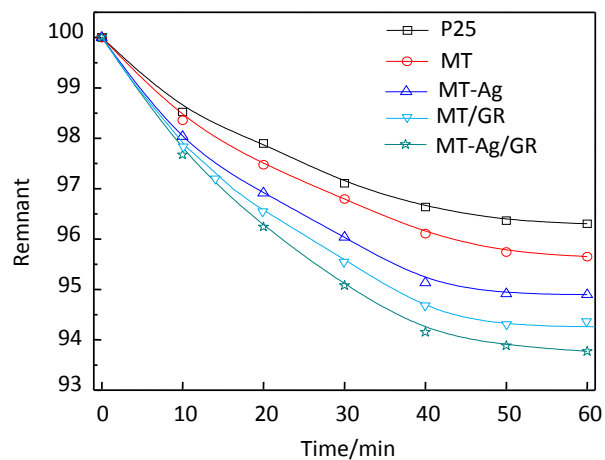

Prior to irradiation, the mixture of the dye and catalyst was stored in the dark to attain adsorption–desorption equilibrium. The amount of adsorbed dye was measured by UV visible spectroscopy and plotted against the catalyst (Fig. S1). We observed some correlation between the amounts of dye adsorbed with the surface area of different composites (compare Table 1 and Fig. S1).

Fig.S2

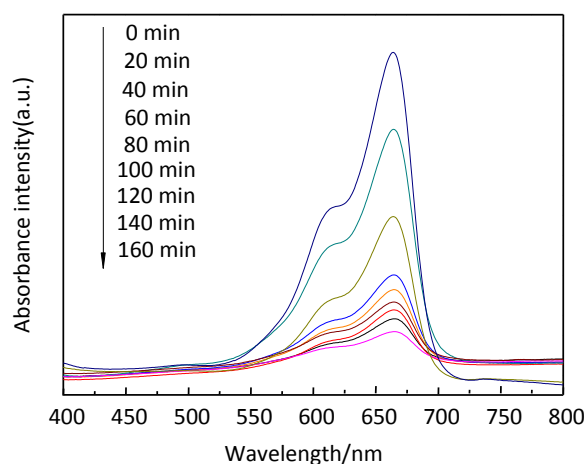

The relationships between Uv-vis absorbance intensity of MB solution and differently photocatalytic time

The  $O_2^{\cdot-}$  and  $\cdot OH$  radicals, together with the holes in photocatalysis process, can directly oxidize the organic dye to colorless small molecules ( $H_2O$  and  $CO_2$ ), following dye content decreasing with the loss of its absorbance intensity (Fig. S2).

The indirect band gaps  $E_g$  are determined by extrapolation of the linear portion of the  $(F(R)hv)^{0.5}$  curve versus the photon energy  $hv$
